# Supplementary material for: Synergistic use of Sentinel-2 and UAV-derived data for Plant Community Cover distribution mapping of coastal meadows with Digital Elevation Models
Source: Copernicus journal article supplement (doi:10.5194/bg-2023-95), 2023-08-01
Supplement: Supplementary file [file bg-2023-95-AC4-supplement.pdf]

RESULTS: Here you clearly show that elevation is a key feature to predict vegetation zonation. That makes 100% sense. I think it would be important to show the DEM to the reader due to the importance of this parameter. That would help to understand whether a species prefers a high or low area, which is directly linked to the ability to withstand a low or high hydroperiod.

*Instead of including this suggestion in the table mentioned in the previous reply, we are showing the distribution of plant communities in relation to the elevation in the following figure, as it describes how the plant communities vary according to the elevation in each study area. Kudani (KUD), Matsalu (MAT), Rumpo (RMP), Rälby (RAL), Tahu North (TAN), Tahu South (TAS).*

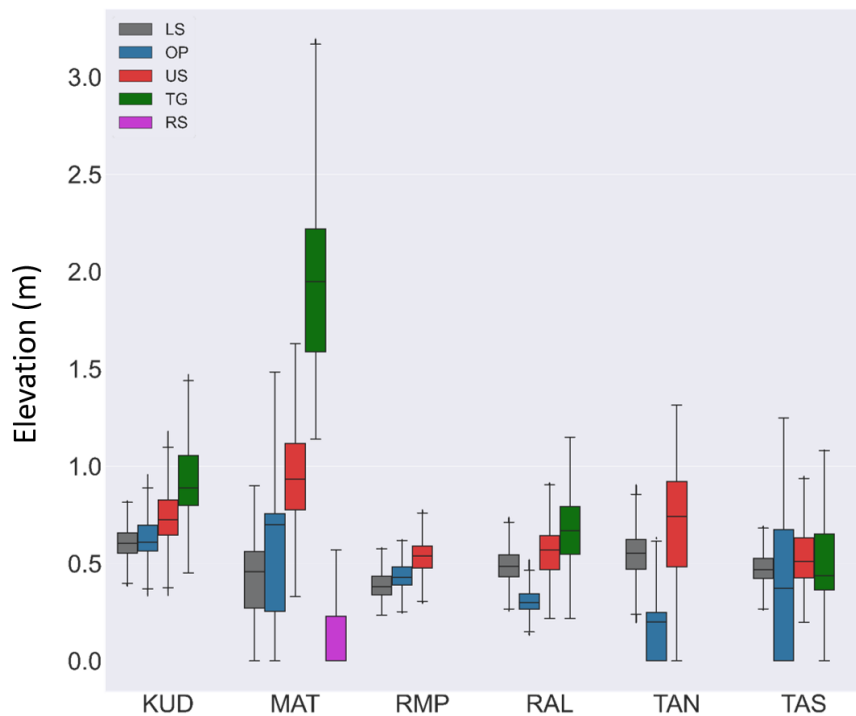

*Plant communities: Lower Shore (LS), Open Pioneer (OP), Upper Shore (US), Tall Grassland (TG), Reed Swamp (RS). This figure is going to be included in the annex.*
